# Supplementary material for: Enhanced 1.54 μm luminescence of a perfluorinated erbium complex sensitized by perfluorinated Pt(ii) and Zn(ii) phthalocyanines with 980 nm emission
Source: Royal Society of Chemistry journal article supplement (doi:10.1039/d0tc05301e), 2020-12-10
Supplement: d0tc05301e1.pdf [file d0tc05301e1.pdf]

## Electronic Supplementary Information (ESI)

### **Enhanced 1.54 $\mu\text{m}$ luminescence of perfluorinated erbium complex sensitized by perfluorinated Pt(II) and Zn(II) phthalocyanines with 980 nm emission**

H. F. Li, X. Q. Liu, C. Lyu, Feng Ma,\* H. Q. Ye,\* Peter. B. Wyatt and W. P. Gillin\*  
Materials Research Institute and School of Physics and Astronomy, Queen Mary  
University of London, Mile End Road, London E1 4NS, UK  
E-mail: w.gillin@qmul.ac.uk, h.ye@qmul.ac.uk

Dr. P. B. Wyatt  
Materials Research Institute and School of Biological and Chemical Sciences, Queen  
Mary University of London, Mile End Road, E1 4NS, UK

Dr. F. Ma  
Tianjin Key Laboratory of Organic Solar Cells and Photochemical Conversion,  
School of Chemistry and Chemical Engineering, Tianjin University of Technology,  
Tianjin 300384, P. R. China  
E-mail: mafontune@sina.com.cn

Prof. W. P. Gillin  
College of Physical Science and Technology, Sichuan University, Chengdu, 610064,  
P. R. China

Keywords: 1.5  $\mu\text{m}$  luminescence, sensitizer showing 980 nm emission,  
perfluorination, erbium complex, metallophthalocyanines

---

## Table of Contents

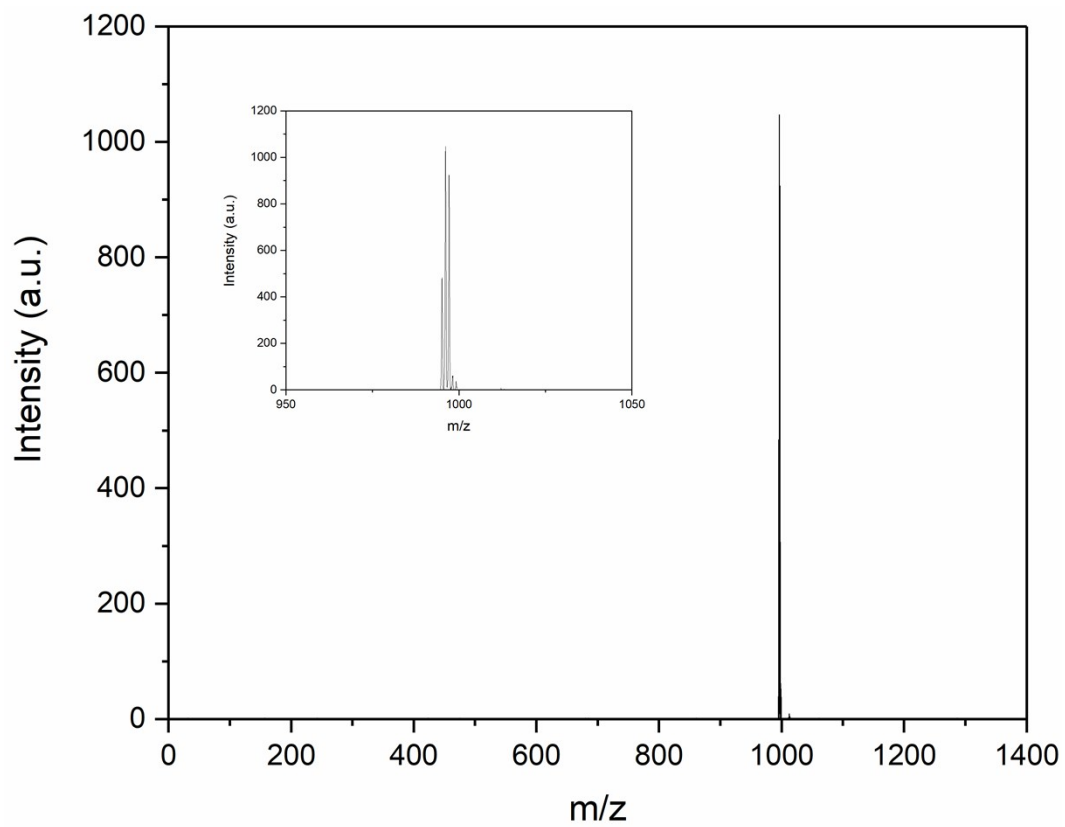

Figure S1 MALDI-TOF mass spectrum for F<sub>16</sub>PtPc

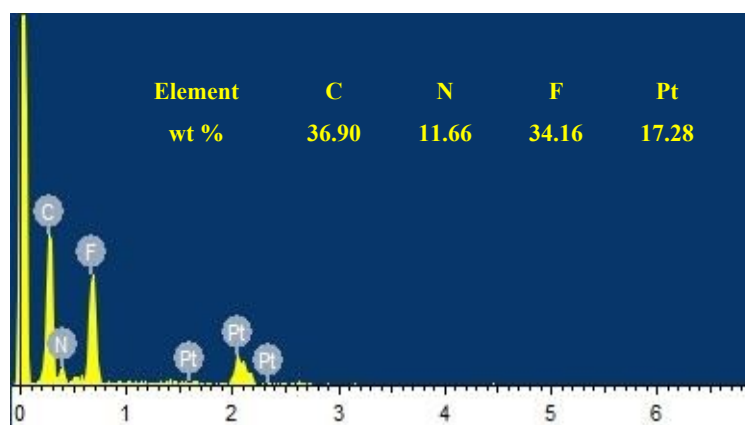

Figure S2 EDS result for  $F_{16}PtPc$  crystal

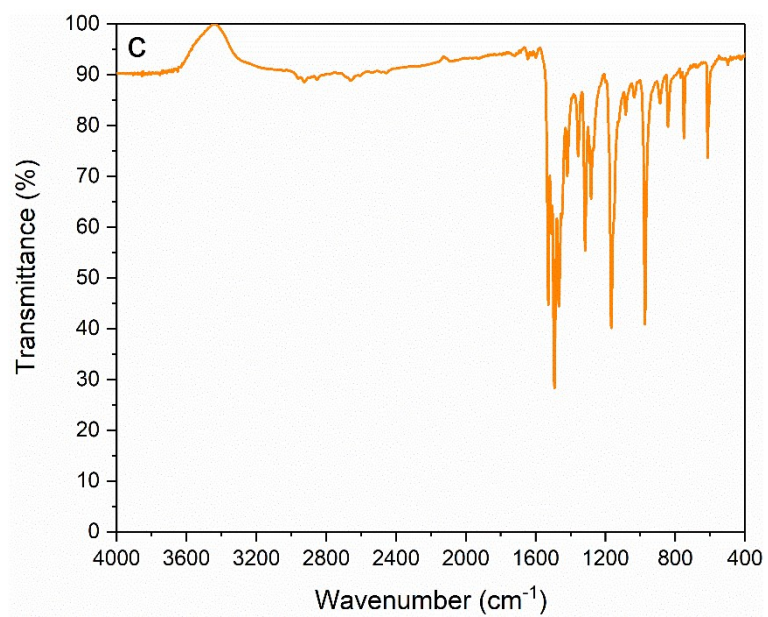

Figure S3 IR spectrum for F<sub>16</sub>PtPc
